# Supplementary material
Source: ML conference proceedings conference paper supplement (https://openaccess.thecvf.com/content/ICCV2023/html/Bounareli_HyperReenact_One-Shot_Reenactment_ICCV_2023_paper.html)
Supplement: Supplementary file 2 [file Bounareli_HyperReenact_One-Shot_Reenactment_ICCV_2023_supplemental.zip]

Archive with 2 entries (2 files):
- 10161-supp-video.mp4
- 10161-supp.pdf
